# Supplementary material for: Intraoperative Angle Measurement of Anatomical Structures: A Systematic Review
Source: MDPI journal article supplement (doi:10.3390/s24051613), 2024-03-01
Supplement: s1 [file s1]

A dark blue outline of a house, consisting of a triangular roof and a rectangular base. The letters 'MDPI' are centered within the house shape.

**MDPI**
