# Supplementary material for: Intraoperative Angle Measurement of Anatomical Structures: A Systematic Review
Source: MDPI journal article supplement (doi:10.3390/s24051613), 2024-03-01
Supplement: s1 [file s1]

# Intraoperative Angle Measurement of Anatomical Structures: A Systematic Review

Table S1: Complete search strategy for the five electronic databases searched, with the results for every keyword, phrase and combination of groups using Boolean operators (\* - refers to a truncated word).

| Search number | Terms                               | Results             |                     |                |           |             |
|---------------|-------------------------------------|---------------------|---------------------|----------------|-----------|-------------|
|               |                                     | PubMed<br>(MEDLINE) | Cochrane<br>Library | Web of Science | Scopus    | IEEE Xplore |
| #1            | surgery                             | 1,460,164           | 257,273             | 1,457,962      | 2,667,953 | 27,686      |
| #2            | surgical operation                  | 4,290               | 16,603              | 90,587         | 271,703   | 1,847       |
| #3            | surgical procedure                  | 50,644              | 27,971              | 247,055        | 833,295   | 3,413       |
| #4            | surgical intervention               | 62,834              | 28,176              | 125,082        | 202,510   | 1,218       |
| #5            | surgical technique                  | 44,401              | 19,884              | 181,894        | 640,022   | 2,444       |
| #6            | osteotomy                           | 34,203              | 2,333               | 38,152         | 67,206    | 121         |
| #7            | #1 OR #2 OR #3<br>OR #4 OR #5 OR #6 | 1,568,781           | 275,661             | 1,684,825      | 3,152,444 | 28,889      |
| #8            | angle measure*                      | 6,534               | 2                   | 25,005         | 36,313    | 2,520       |
| #9            | angle determin*                     | 137                 | 0                   | 1,019          | 1,837     | 200         |
| #10           | angle calculate*                    | 0                   | 0                   | 228            | 743       | 35          |
| #11           | angle comput*                       | 16                  | 0                   | 216            | 500       | 159         |
| #12           | angle assess*                       | 145                 | 0                   | 222            | 279       | 22          |
| #13           | angle evaluat*                      | 71                  | 0                   | 184            | 295       | 33          |
| #14           | angle estimate*                     | 73                  | 0                   | 465            | 750       | 261         |
| #15           | angle mensurat*                     | 0                   | 0                   | 0              | 0         | 0           |
| #16           | angle quantif*                      | 6                   | 0                   | 34             | 52        | 2           |
| #17           | angle valuat*                       | 0                   | 0                   | 0              | 1         | 0           |
| #18           | orientation measure*                | 302                 | 2                   | 1,565          | 2,296     | 351         |
| #19           | orientation determin*               | 161                 | 0                   | 849            | 1,260     | 136         |
| #20           | orientation calculate*              | 0                   | 0                   | 46             | 105       | 7           |
| #21           | orientation comput*                 | 8                   | 0                   | 84             | 159       | 81          |
| #22           | orientation assess*                 | 52                  | 0                   | 107            | 158       | 5           |
| #23           | orientation evaluat*                | 24                  | 0                   | 95             | 165       | 11          |
| #24           | orientation estimate*               | 84                  | 0                   | 357            | 500       | 177         |
| #25           | orientation mensurat*               | 0                   | 0                   | 1              | 1         | 0           |
| #26           | orientation quantif*                | 10                  | 0                   | 34             | 42        | 6           |
| #27           | orientation valuat*                 | 0                   | 0                   | 1              | 0         | 0           |
| #28           | "pose measure"                      | 31                  | 0                   | 587            | 908       | 319         |
| #29           | "pose determin"                     | 25                  | 0                   | 307            | 430       | 177         |
| #30           | "pose calculate"                    | 0                   | 0                   | 8              | 21        | 4           |
| #31           | "pose comput"                       | 0                   | 0                   | 150            | 260       | 113         |
| #32           | "pose assess"                       | 0                   | 0                   | 15             | 21        | 5           |
| #33           | "pose evaluat"                      | 11                  | 0                   | 45             | 64        | 26          |
| #34           | "pose estimate"                     | 40                  | 0                   | 925            | 1170      | 632         |
| #35           | "pose mensurat"                     | 0                   | 0                   | 0              | 0         | 1           |
| #36           | "pose quantif"                      | 0                   | 0                   | 0              | 0         | 0           |
| #37           | "pose valuat"                       | 0                   | 0                   | 0              | 1         | 0           |
| #38           | angular position measure*           | 7                   | 0                   | 87             | 146       | 79          |

Continued on next page

Table S1: Complete search strategy for the five electronic databases searched, with the results for every keyword, phrase and combination of groups using Boolean operators (\* - refers to a truncated word). (Continued)

| Search number | Terms                                     | Results             |                     |                |           |             |
|---------------|-------------------------------------------|---------------------|---------------------|----------------|-----------|-------------|
|               |                                           | PubMed<br>(MEDLINE) | Cochrane<br>Library | Web of Science | Scopus    | IEEE Xplore |
| #39           | angular position determin**               | 0                   | 0                   | 7              | 14        | 5           |
| #40           | angular position calculate**              | 0                   | 0                   | 1              | 3         | 1           |
| #41           | angular position comput**                 | 0                   | 0                   | 1              | 5         | 2           |
| #42           | angular position assess**                 | 0                   | 0                   | 0              | 0         | 1           |
| #43           | angular position evaluat**                | 0                   | 0                   | 2              | 1         | 0           |
| #44           | angular position estimate**               | 0                   | 0                   | 4              | 8         | 4           |
| #45           | angular position mensurat**               | 0                   | 0                   | 0              | 0         | 0           |
| #46           | angular position quantif**                | 0                   | 0                   | 0              | 0         | 0           |
| #47           | angular position valuat**                 | 0                   | 0                   | 0              | 0         | 0           |
| #48           | angular displacement<br>measure**         | 26                  | 0                   | 101            | 171       | 52          |
| #49           | angular displacement<br>determin**        | 0                   | 0                   | 7              | 9         | 2           |
| #50           | angular displacement<br>calculate**       | 0                   | 0                   | 1              | 2         | 0           |
| #51           | angular displacement<br>comput**          | 0                   | 0                   | 0              | 0         | 4           |
| #52           | angular displacement assess**             | 0                   | 0                   | 0              | 0         | 0           |
| #53           | angular displacement<br>evaluat**         | 0                   | 0                   | 2              | 2         | 0           |
| #54           | angular displacement<br>estimate**        | 2                   | 0                   | 2              | 2         | 0           |
| #55           | angular displacement<br>mensurat**        | 0                   | 0                   | 0              | 0         | 0           |
| #56           | angular displacement<br>quantif**         | 0                   | 0                   | 0              | 0         | 0           |
| #57           | angular displacement<br>valuat**          | 0                   | 0                   | 0              | 0         | 0           |
| #58           | #8 OR #9 OR (...) OR #56 OR<br>#57        | 7,671               | 4                   | 32,384         | 48,058    | 6,451       |
| #59           | intraoperative                            | 162,974             | 31,344              | 141,601        | 232,347   | 1,331       |
| #60           | perioperative                             | 126,676             | 23,356              | 116,252        | 163,360   | 151         |
| #61           | in-surgery                                | 21,620              | 1,550               | 17,869         | 27,766    | 427         |
| #62           | intrasurgical                             | 370                 | 65                  | 260            | 353       | 8           |
| #63           | operating room                            | 31,707              | 5,763               | 56,047         | 84,900    | 6,019       |
| #64           | real-time                                 | 327,719             | 11,751              | 797,192        | 1,302,463 | 268,351     |
| #65           | #59 OR #60 OR #61<br>OR #62 OR #63 OR #64 | 638,383             | 66,511              | 1,097,625      | 1,760,092 | 275,424     |
| #66           | #7 AND #58 AND #65                        | 42                  | 0                   | 86             | 163       | 0           |
