# Supplementary figures and images for: Intraoperative Angle Measurement of Anatomical Structures: A Systematic Review
Source: MDPI journal article supplement (doi:10.3390/s24051613), 2024-03-01

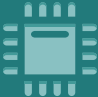

*sensors*

Supplement: s1 [file s1]

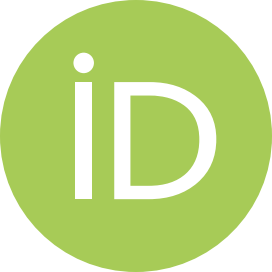

Supplement: s1 [file s1]

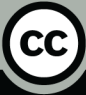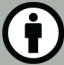

BY

Supplement: s1 [file s1]
